# Supplementary material for: Mechanism of action of trabectedin in desmoplastic small round cell tumor cells
Source: BMC Cancer. 2017 Feb 6;17:107. doi: 10.1186/s12885-017-3091-1 (PMC5294815; doi:10.1186/s12885-017-3091-1)
Supplement: Additional file 2: — RT-Q-PCR primers. Table of RT-Q-PCR primers used. (XLSX 10 kb) [file 12885_2017_3091_MOESM2_ESM.xlsx]

## Sheet: Foglio1
		5'to 3' sequence	Amplicon Lenght	Gene Bank ID
EWS-WT1 chimera	EWS_ex7_fw	CAGCCTCCCACTAGTTACCC	167	2130
	WT1_ex8_rw	TGGTGTCTTTTGAGCTGGTC		7490
IGF2	IGF2_Prom_CHIP_FW	ggcctctctgtctcctacga	114	3481
	IGF2_Prom_CHIP_RW	CTCCCTGTCCACGTCCTGAG
EGFR	EGFR_Prom_CHIP_FW	tcctcgcattctcctcctcc	114	1956
	EGFR_Prom_CHIP_RW	tgcccggacgtctagctc
	EGFR_RT_EX1-2_FW	GGGCTCTGGAGGAAAAGAAAGT	130
	EGFR_RT_EX1-2_RW	TCCAAATTCCCAAGGACCACC
PDGF	PDGF_Prom_CHIP_FW	CAGGAAGCTCAACCCCTCTG	114	515
	PDGF_Prom_CHIP_RW	TTGGTACCGTATTGAGAACCCAC
ENT-4	ENT4(-KTS)_prom_FW	ggccccttcctcgttctc	131	222962
	ENT4(-KTS)_prom_RW	atcagccgcaaagttggc
	ENT4_ex2_RT_FW	CAGACCCGGGCGTAGTGAT	117
	ENT4_ex2_RT_RW	TAGTATCCGTGAAAGCTGGG
